# Supplementary material for: Partial entropy decomposition reveals higher-order information structures in human brain activity
Source: PubMed Central journal article supplement — Proc Natl Acad Sci U S A. 2023 Jul 19;120(30):e2300888120. doi: 10.1073/pnas.2300888120 (PMC10372615; doi:10.1073/pnas.2300888120), 2023-07-19
Supplement: pnas.2300888120.sapp.pdf [file pnas.2300888120.sapp.pdf]

# PNAS

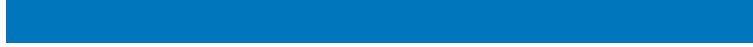

1

## 2 **Supporting Information for**

### 3 **Partial entropy decomposition reveals higher-order structures in human brain activity**

4 **Thomas F. Varley, Maria Pope, Maria Grazia Puxeddu, Josh Faskowitz, Olaf Sporns**

5 **Corresponding Thomas F. Varley.**

6 **E-mail: [tvarley@iu.edu](mailto:tvarley@iu.edu)**

#### 7 **This PDF file includes:**

8 Figs. S1 to S3

9 Tables S1 to S3

10 SI References

11 **1. Supplementary Figures**

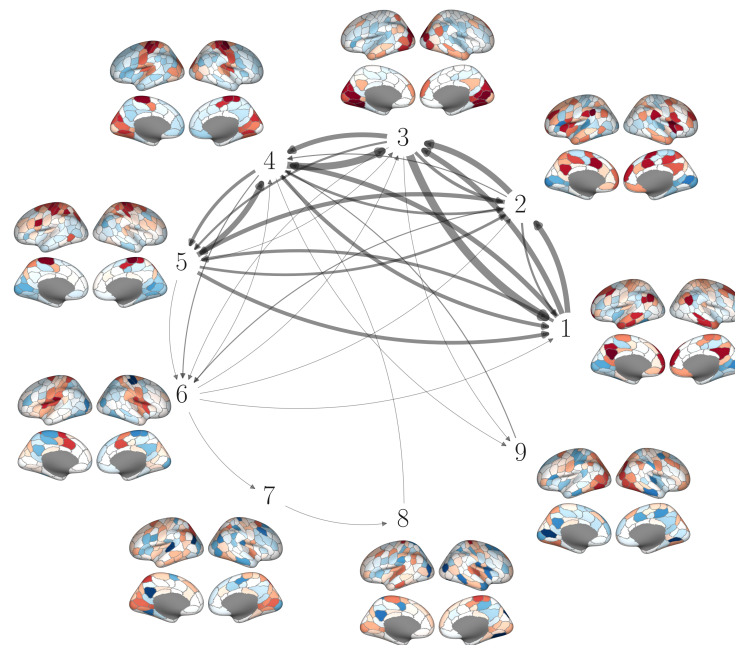

**Fig. S1. State-to-state transitions.** For each of the nine distinct states, we can see how many times each state transitions another (self-loops are not shown for visual clarity). We can see that the various states have meaningful differences between each-other (e.g. the visual system or the somato-motor systems both transition from redundancy- to synergy-dominated configurations over time), however, within a state, the patterns are largely symmetrical across hemispheres.

## 12 2. Partial Entropy Decomposition

13 The *partial entropy decomposition* (PED) provides a framework with which we can extract *all* of the meaningful structure  
 14 in a system of interacting random variables (1). By structure, we are referring to the (possibly higher-order) patterns of  
 15 information-sharing between elements. Consider a system  $\mathbf{X} = \{X_1, X_2, \dots, X_N\}$ , comprised of  $N$  interacting, discrete random  
 16 variables: the set of all informative relationships between elements (and ensembles of elements) in  $\mathbf{X}$  forms its structure. We  
 17 begin by defining the total entropy of  $\mathbf{X}$  using the Shannon entropy:

$$18 \quad \mathcal{H}(\mathbf{X}) := - \sum_{\mathbf{x} \in \mathfrak{X}} \mathcal{P}(\mathbf{x}) \log_2 \mathcal{P}(\mathbf{x}) \quad [1]$$

19 Where  $\mathbf{x}$  indicates a particular configuration of  $\mathbf{X}$  and  $\mathfrak{X}$  is the support set of  $\mathbf{X}$ . This joint entropy quantifies, on average,  
 20 how much it is possible to know about  $\mathbf{X}$  (i.e. how many bits of information would be required, on average, to reduce our  
 21 uncertainty to zero). The entropy is a summary statistic describing an entire distribution  $\mathcal{P}(X)$ :

$$22 \quad \mathcal{H}(\mathbf{X}) = \mathbb{E}[-\log_2 \mathcal{P}(\mathbf{x})] \quad [2]$$

23 Where  $-\log_2 \mathcal{P}(x)$  is the *local entropy*  $h(\mathbf{x})$ . We can intuitively understand the local entropy with the logic of local  
 24 probability mass exclusions (2, 5). Suppose that we observe  $\mathbf{X} = \mathbf{x}$ . Upon observing  $\mathbf{x}$ , we can immediately *rule out* the  
 25 possibility that  $\mathbf{X}$  is in any state  $\neg\mathbf{x}$ , and by ruling out those possibilities, we exclude all the probability mass associated with  
 26  $\mathcal{P}(\mathbf{X} = \neg\mathbf{x})$ . If  $\mathcal{P}(\mathbf{x})$  is very low, then upon learning  $\mathbf{X} = \mathbf{x}$ , we exclude a large amount of probability mass ( $1 - \mathcal{P}(\mathbf{x})$ ), and  
 27 consequently,  $h(\mathbf{x})$  is high. Conversely, if  $\mathcal{P}(\mathbf{x})$  is large, then only a small amount of probability mass is excluded, and so  $h(\mathbf{x})$   
 28 is low.

29 **A. Quantifying Shared Entropy.** The measure  $h(\mathbf{x})$  is a very crude one: it gives us a single summary statistic that describes the  
 30 behaviour of the whole without making reference to the structure of the relationships between  $\mathbf{x}$ 's constituent elements. If  
 31  $\mathbf{X}$  has some non-trivial structure that integrates multiple elements (or ensembles of elements), then we propose that those  
 32 elements must share entropy. This notion of shared entropy forms the cornerstone of the PED. The way all of the parts of  
 33  $\mathbf{X}$  share entropy forms the structure of the system. In the original proposal of the PED by Ince (1), shared entropy ( $\mathcal{H}_{cs}$ )  
 34 was defined using the local co-information, which treats the entropy of variables as sets and defines the shared entropy using  
 35 inclusion-exclusion criteria. Unfortunately, as discussed by Finn and Lizier, the set-theoretic interpretation of multivariate  
 36 mutual information is complex, as both the expected and local co-information can be negative (6), and the PED computed  
 37 using Ince's proposed method can result in negative values that are difficult to interpret.

38 Here, we propose an alternative way to operationalize the notion of redundant entropy by saying that two variables  
 39  $X_1, X_2 \in \mathbf{X}$  share entropy if they induce the same exclusions: i.e. if learning  $X_1$  or  $X_2$  rules out the same configurations of the  
 40 whole (5). Our goal, then, becomes to determine how the entropy of the whole is parcellated out over (potentially multivariate)  
 41 sharing modes between parts.

| $P$      | $X_1$ | $X_2$ |
|----------|-------|-------|
| $P_{00}$ | 0     | 0     |
| $P_{01}$ | 0     | 1     |
| $P_{10}$ | 1     | 0     |
| $P_{11}$ | 1     | 1     |

Table S1. Joint entropy of two discrete random variables that together make up the macro-variable  $\mathbf{X}$ .

42 In our toy system given by Table S1, suppose we learn that  $X_1 = 0$  OR  $X_2 = 0$ . Only one global state is excluded:  $\mathbf{X} = (1, 1)$   
 43 is incompatible with both possibilities, regardless of which is true. Consequently we are only excluding  $P_{11}$  from the overall  
 44 distribution. We can quantify this shared entropy using the *local entropy of shared exclusions*  $h_{sx}$ :

$$45 \quad h_{sx}^{\mathbf{x}}(\{1\}\{2\}) = -\log_2 \mathcal{P}(x_1 \cup x_2) \quad [3]$$

46 Here, we are adapting the partial entropy notation first introduced by Ince in (15). The function  $h_{sx}^{\mathbf{x}}(\{1\}\{2\})$  quantifies  
 47 the total probability mass of  $\mathcal{P}(\mathbf{X})$  excluded by learning either  $X_1 = x_1$  or  $X_2 = x_2$ . Said differently, it is the amount of  
 48 information that could be learned from either variable alone. Importantly, while it *is* a measure of dependency, it is distinct  
 49 from the classic mutual information. Unlike the  $h_{cs}$  function (1) (and several other redundant mutual information functions, e.g.  
 50 (7, 9, 15)), our measure  $h_{sx}$  operates on the entire joint probability distribution, rather than demanding that redundancy be a  
 51 function of the pairwise marginals. This sets it apart from other redundancy functions, although it is not unique in this regard  
 52 (the  $i_{sx}$  redundancy function shares this property). For a more detailed discussion of this issue, see Supplementary Material.

53 So far, we have restricted our examples to the simple case of two variables,  $x_1$  and  $x_2$ , however, we are interested in  
 54 the general case of information common to arbitrarily large, potentially overlapping subsets of a system that has adopted a  
 55 particular state  $\mathbf{x}$ . This requires first enumerating the set of subsets,  $\mathbf{s}$ , which we will call the set of *sources*. It is equivalent to  
 56 the power set of  $\mathbf{x}$ , excluding the empty set. For example, if  $\mathbf{x} = \{x_1, x_2, x_3\}$ , then the source set  $\mathbf{s}$  is equal to:

$$\mathbf{s} = \left\{ \begin{array}{l} \{x_1\}, \{x_2\}, \{x_3\}, \\ \{x_1, x_2\}, \{x_1, x_3\}, \{x_2, x_3\}, \\ \{x_1, x_2, x_3\} \end{array} \right\} \quad [4]$$

We are interested in how collections of sources  $\mathbf{a} \in \mathbf{s}$  might share entropy (i.e. to what extent they exclude the same possible global configurations of  $\mathbf{x}$ ), which allows us to write our redundant entropy function in full generality. For a collection of sources  $\{\mathbf{a}_1, \dots, \mathbf{a}_k\}$ :

$$h_{sx}(\mathbf{a}_1, \dots, \mathbf{a}_k) := \log_2 \frac{1}{\mathcal{P}(\mathbf{a}_1 \cup \dots \cup \mathbf{a}_k)} \quad [5]$$

$h_{sx}$  can be interpreted in terms of logical conjunctions and disjunctions of variables (12). Consider the example:  $h_{sx}(\{x_1\}\{x_2, x_3\})$ , which quantifies the amount of probability mass about the state of the whole that would be excluded by observing just the part  $x_1$  **or** the joint state of  $x_2$  **and**  $x_3$ . This relationship between probability mass exclusions on one hand, and formal logic on the other, places  $h_{sx}$  on a sound conceptual footing. While initially defined locally, it is possible to compute an expected value  $\mathcal{H}_{sx}$  for a joint distribution:

$$\mathcal{H}_{sx}(\mathbf{A}_1, \dots, \mathbf{A}_k) := \mathbb{E}[h_{sx}(\mathbf{a}_1, \dots, \mathbf{a}_k)] \quad [6]$$

The function  $h_{sx}$  is derived from prior work by Makkeh et al. (3), who proposed a redundant information (rather than entropy) function,  $i_{sx}$ . This function decomposes the information that a set of sources discloses about a single target, and they noted that if the target was the joint state of all the sources, then the result was a decomposition of the joint entropy of the whole. This is based on the identity that  $i(x_1, \dots, x_k; \mathbf{x}) = h(\mathbf{x})$  (where  $\mathbf{x} = \{x_1, \dots, x_k\}$ ). Formally:

$$h_{sx}(\mathbf{a}_1, \dots, \mathbf{a}_k) = i_{sx}(\mathbf{a}_1, \dots, \mathbf{a}_k; \boldsymbol{\alpha}) \quad [7]$$

This framing makes it intuitively clear that the redundant entropy is the information about the whole that could be learned by observing any of the component parts. While this relationship was noted in (3) and termed  $h_{sx}$ , it was not explored in any detail. We have opted to retain their nomenclature ( $h_{sx}$ ) in our study of the function. For a deeper analysis of the relationship between  $i_{sx}$  and  $h_{sx}$ , see the Supplementary Material.

**B. The Partial Entropy Lattice.** Our function  $h_{sx}$  has a number of appealing mathematical properties, which collectively satisfy the set of Axioms initially introduced by Williams & Beer for the problem of information decomposition (4) as applied to local information (2, 3):

**Symmetry:**  $h_{sx}$  is invariant under permutation of its argument:  $h_{sx}(\mathbf{a}_1, \dots, \mathbf{a}_k) = h_{sx}(\sigma(\mathbf{a}_1), \dots, \sigma(\mathbf{a}_k))$

**Monotonicity:**  $h_{sx}$  decreases as more sources are added:  $h_{sx}(\mathbf{a}_1, \dots, \mathbf{a}_k) \leq h_{sx}(\mathbf{a}_1, \dots, \mathbf{a}_k, \mathbf{a}_{k+1})$

**Self-redundancy:** In the special case of a single source,  $h_{sx}$  is equivalent to the classic local Shannon entropy:  $h_{sx}(\mathbf{a}) = h(\mathbf{a})$ .

For proof of these, see (3) Appendix A. Based on these properties, it is possible to specify the domain of  $h_{sx}$  (all non-degenerate combinations of sources) in terms of a partially-ordered lattice structure  $\mathfrak{A}$  (2, 4). One of the core insights of Williams and Beer was that if one source  $\mathbf{a} \subset \mathbf{b}$ , then the information about some third source  $\mathbf{c}$  redundantly disclosed by  $\mathbf{a}$  or  $\mathbf{b}$  is equivalent to the information disclosed by  $\mathbf{a}$  alone. Consequently, we do not have to compute the redundancy for all possible combination of sources, only all those collections such that no component source is a superset of any other:

$$\mathfrak{A} = \{\boldsymbol{\alpha} \in \mathbb{P}_1(\mathbf{s}) : \forall \mathbf{a}_i, \mathbf{a}_j \in \boldsymbol{\alpha}, \mathbf{a}_i \not\subset \mathbf{a}_j\} \quad [8]$$

Where  $\mathbb{P}_1(\mathbf{s})$  indicates the power set of  $\mathbf{s}$ , excluding the empty set. For an in-depth derivation of the lattice, see (2, 4, 12), for a visualization of the lattice, see Fig. S2. The value of any element  $h_{\partial}(\boldsymbol{\alpha})$  on the lattice can be computed via Mobius inversion:

$$h_{\partial}^{\mathbf{x}}(\boldsymbol{\alpha}) = h_{sx}(\boldsymbol{\alpha}) - \sum_{\beta \leq \boldsymbol{\alpha}} h_{\partial}^{\mathbf{x}}(\beta) \quad [9]$$

The result is the entropy specific to a particular  $\boldsymbol{\alpha}$  and *no simpler combination of sources*. Furthermore, the structure of the lattice and the properties of  $h_{sx}$  ensure that  $h_{\partial}^{\mathbf{x}}(\boldsymbol{\alpha})$  will always be non-negative. We can re-compute the total joint entropy of  $\mathbf{x}$  as:

$$h(\mathbf{x}) = \sum_{i=1}^{|\mathfrak{A}|} h_{\partial}^{\mathbf{x}}(\boldsymbol{\alpha}_i) \quad [10]$$

Like  $h_{sx}$ , it is also possible to compute an expected value of  $h_{\partial}$  (which will also be strictly non-negative):

$$\mathcal{H}_{\partial}^{\mathbf{x}}(\boldsymbol{\alpha}) = \mathbb{E}[h_{\partial}^{\mathbf{x}}(\boldsymbol{\alpha})] \quad [11]$$

100 **C. Decomposing Marginal and Joint Entropies.** Having defined  $h_{sx}$  and the Mobius inversion on the partial entropy lattice, we  
 101 can now do a complete decomposition of the joint entropy, and its marginal components. For example, consider the bivariate  
 102 system  $\mathbf{X} = \{X_1, X_2\}$ . We can decompose the joint entropy:

$$\begin{aligned} \mathcal{H}(\mathbf{X}) &= \mathcal{H}_\partial^{12}(\{1\}\{2\}) + \mathcal{H}_\partial^{12}(\{1\}) \\ &\quad + \mathcal{H}_\partial^{12}(\{2\}) + \mathcal{H}_\partial^{12}(\{1, 2\}) \end{aligned} \quad [12]$$

103 Furthermore, we can decompose the associated marginal entropies in a manner consistent with the partial information  
 104 decomposition (4):

$$\mathcal{H}(X_1) = \mathcal{H}_\partial^{12}(\{1\}\{2\}) + \mathcal{H}_\partial^{12}(\{1\}) \quad [13]$$

$$\mathcal{H}(X_2) = \mathcal{H}_\partial^{12}(\{1\}\{2\}) + \mathcal{H}_\partial^{12}(\{2\}) \quad [14]$$

105 These decompositions can be done for larger ensembles, or more statistical dependencies (see below) and can reveal how  
 106 higher-order interactions can complicate (and in some cases, compromise) the standard bivariate approaches to functional  
 107 connectivity.

### 108 3. Mathematical Properties of $\mathcal{H}_{sx}$

109 **A. Partial Entropy Decomposition & Partial Information Decomposition.** The redundant *entropy* function  $h_{sx}$  is closely related  
 110 to the redundant *information* function  $i_{sx}$  proposed by Makkeh et al., (3), and was briefly mentioned in their paper as a  
 111 possible extension of  $i_{sx}$ , although it was not explored in detail, which we will do here. The function  $h_{sx}$  is defined:

$$h_{sx}(\mathbf{a}_1, \dots, \mathbf{a}_k) := \log \frac{1}{\mathcal{P}(\mathbf{a}_1 \cup \dots \cup \mathbf{a}_k)} \quad [15]$$

112 This measure is equivalent to the *informative* component of the measure  $i_{sx}$  proposed by Makkeh et al., (3) in the context  
 114 of single-target partial information decomposition. The local redundant information function  $i_{sx}$  is defined:

$$i_{sx}(\mathbf{a}^1, \dots, \mathbf{a}^k; y) := \quad [16]$$

$$\log_2 \frac{\mathcal{P}(y) - \mathcal{P}(y \cap (\bar{\mathbf{a}}^1 \cap \dots \cap \bar{\mathbf{a}}^k))}{1 - \mathcal{P}(\bar{\mathbf{a}}^1 \cap \dots \cap \bar{\mathbf{a}}^k)} - \log_2 \mathcal{P}(y) \quad [17]$$

115 Which can be further decomposed into *informative* and *misinformative* components (3, 5):

$$i_{sx}^+(\mathbf{a}_1, \dots, \mathbf{a}_k; y) := \log_2 \frac{1}{\mathcal{P}(\mathbf{a}_1 \cup \dots \cup \mathbf{a}_k)} \quad [18]$$

$$i_{sx}^-(\mathbf{a}_1, \dots, \mathbf{a}_k; y) := \log_2 \frac{\mathcal{P}(y)}{\mathcal{P}(y \cap (\mathbf{a}_1 \cup \dots \cup \mathbf{a}_k))} \quad [19]$$

$$i_{sx}(\mathbf{a}_1, \dots, \mathbf{a}_k; y) = i_{sx}^+(\mathbf{a}_1, \dots, \mathbf{a}_k; y) - i_{sx}^-(\mathbf{a}_1, \dots, \mathbf{a}_k; y) \quad [20]$$

116 Where it is clear that  $h_{sx}(\cdot) = i_{sx}^+(\cdot; y)$ , with the sole difference that  $i_{sx}^+(\cdot; y)$  is implicitly defined with respect to some target  
 117 variable  $y$  (although  $y$  has no actual impact on the value). Below, we show that, if the target  $y$  is set to the joint state of the  
 118 whole  $(\mathbf{x})$ , then the partial entropy decomposition of  $h(\mathbf{x})$  with  $h_{sx}$  as the shard entropy function becomes equivalent to the  
 119 partial information decomposition  $i(x_1, \dots, x_N; \mathbf{x})$  with  $i_{sx}$  as the redundant entropy function. The notion that the PED is  
 120 equivalent to doing the PID of the information all the parts disclose about the whole was mentioned parenthetically in (3),  
 121 although the finding that the informative component is all that is required is novel.

122 Given the equivalence between  $h_{sx}(\cdot)$  and  $i_{sx}^+(\cdot; y)$ , it suffices to show that  $i_{sx}^-(x_1, \dots, x_N; \mathbf{x}) = 0$  bit in all cases. When  
 123  $y = \mathbf{x}$ , we can re-write the function as:

$$i_{sx}^-(x_1, \dots, x_N; \mathbf{x}) = \quad [21]$$

$$\log_2 \frac{\mathcal{P}(x_1 \cap \dots \cap x_N)}{\mathcal{P}((x_1 \cap \dots \cap x_N) \cap (x_1 \cup \dots \cup x_N))}$$

124 the union of  $x^1 \cup \dots \cup x^k$  is clearly a superset of  $x^1 \cap \dots \cap x^k$ , so

$$i_{sx}^- = \log_2 \frac{\mathcal{P}(x_1 \cap \dots \cap x_N)}{\mathcal{P}(x_1 \cap \dots \cap x_N)} \quad [22]$$

126 Which is clearly  $\log_2(1) = 0$  bit  $\square$

127 We can understand the partial entropy decomposition using  $h_{sx}$  as being equivalent to the decomposition of  $i(x_1, \dots, x_N; \mathbf{x})$ .  
 128 Intuitively, this is consistent with the identity for discrete variables that  $\mathcal{I}(\mathbf{X}, \mathbf{X}) = \mathcal{H}(\mathbf{X})$ . The vanishing misinformative term  
 129 can be seen as a special case of the results presented by Ehrlich et al., (16), who proved a general result that the misinformative  
 130 component of  $I_{sx}(\mathbf{X}; Y)$  vanishes if there exists some deterministic function  $f : Y \mapsto \mathbf{X}$ .

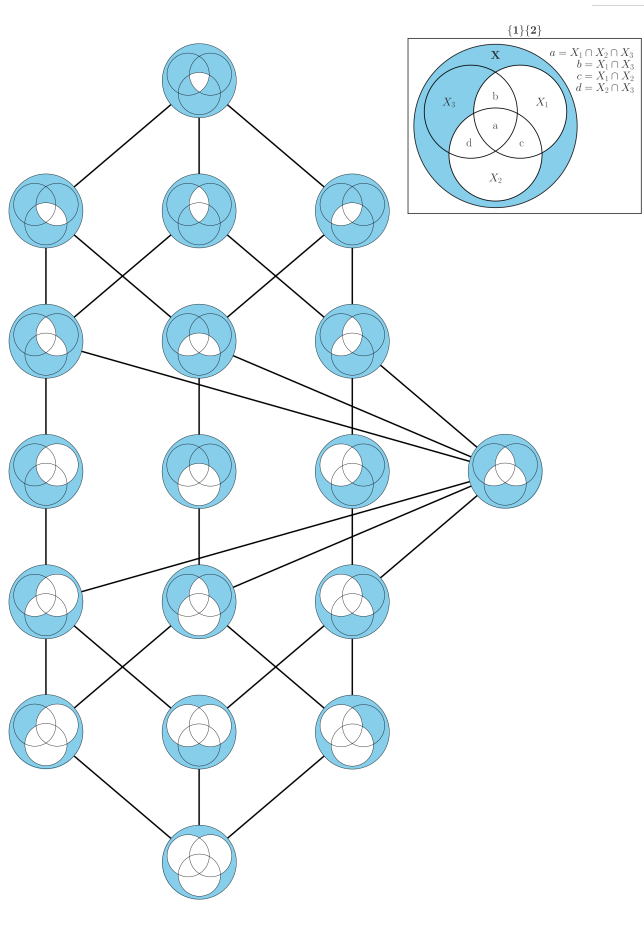

**Fig. S2. The partial entropy lattice.** The lattice of partial entropy atoms induced by the  $\mathcal{H}_{s,x}$  function. Each vertex of the lattice corresponds to a single PE atom, and the Venn diagram describes the associated structure of probability mass exclusions. The blue area indicates the probability mass from  $\mathcal{P}(\mathbf{x})$  that is excluded by some combination of observations. For example, in the legend, we can see the probability mass excluded by observing  $X_1 \vee X_2$ . The blue area is all of the probability mass one would exclude after learning the state of *either* component alone. The lowest atom is the entropy redundant to all three elements ( $\mathcal{H}_{s,x}(\{1\}\{2\}\{3\})$ ), and the dependencies get increasingly synergistic higher on the lattice.

| XOR           |       |          |       |     | AND |               |       |          |       |     |     |
|---------------|-------|----------|-------|-----|-----|---------------|-------|----------|-------|-----|-----|
| $\mathcal{P}$ | $X_1$ | $\oplus$ | $X_2$ | $=$ | $T$ | $\mathcal{P}$ | $X_1$ | $\wedge$ | $X_2$ | $=$ | $T$ |
| 1/4           | 0     |          | 0     |     | 0   | 1/4           | 0     |          | 0     |     | 0   |
| 1/4           | 0     |          | 1     |     | 1   | 1/4           | 0     |          | 1     |     | 0   |
| 1/4           | 1     |          | 0     |     | 1   | 1/4           | 1     |          | 0     |     | 0   |
| 1/4           | 1     |          | 1     |     | 0   | 1/4           | 1     |          | 1     |     | 1   |

Table S2. Logical XOR and AND gates.

**B. Example: Logical Exclusive-OR (XOR) Gate.** To demonstrate how partial entropy decomposition can be used to untangle higher-order interactions, consider the logical exclusive-OR (XOR) gate (for the lookup table, see Table S2). The XOR gate is an example of a *synergistic* logic gate: the ability to predict the state of the target  $T$  depends on having access to both  $X_1$  and  $X_2$  jointly: the pairwise marginal mutual informations are equal to 0:  $\mathcal{I}(X_1; T) = \mathcal{I}(X_2; T) = 0$  bit, but the joint mutual information is nonzero:  $\mathcal{I}(X_1, X_2; T) = 1$  bit.

We can initially see that the triple-redundancy  $\mathcal{H}_\delta^{12T}(\{1\}\{2\}\{T\}) = 0$  bit. This is because any configuration of logical disjunctions does not actually rule out any states: for example,  $\mathcal{P}(X_1 = 0 \cup X_2 = 0 \cup T = 0) = 1$  as there is no configuration  $(1, 1, 1)$  that can be excluded. Other results can be unintuitive. For example, most of the partial entropy is shared between the three bivariate relationships  $\mathcal{H}_\delta^{12T}(\{1\}\{2\})$ ,  $\mathcal{H}_\delta^{12T}(\{1\}\{T\})$ , and  $\mathcal{H}_\delta^{12T}(\{2\}\{T\})$ . How is this consistent with the fact that the mutual information between any pair of variables is zero? The bivariate redundancy can be non-zero in this case because, on average, knowing the local state of  $x_1 \vee x_2$  reduces our uncertainty about the joint state of  $\{x_1, x_2, t\}$ . For example, suppose we learn that  $x_1 = 1 \vee x_2 = 1$ . This *excludes* the joint configuration  $\{x_1 = 0, x_2 = 0, t = 0\}$ . This exclusion of the associated probability mass is recognized by  $h_{sx}(\cdot)$  as informative, in that it reduces our uncertainty about the joint-state of the whole, despite the fact that, on average,  $X_1$  and  $X_2$  disclose no information about  $T$ . There is no redundant information common to  $X_1$ ,  $X_2$  and  $T$ , however, and there a number of higher-order dependencies, such as  $\mathcal{H}_\delta^{12T}(\{1\}\{2, T\})$  and  $\mathcal{H}_\delta^{12T}(\{1, 2\}\{1, T\}\{2, T\})$ .

| Atom                       | $\mathcal{H}_\delta^{12T}  $ | XOR   | AND   | MaxEnt |
|----------------------------|------------------------------|-------|-------|--------|
| $\{1\}\{2\}\{T\}$          |                              | 0.0   | 0.208 | 0.193  |
| $\{1\}\{2\}$               |                              | 0.415 | 0.208 | 0.222  |
| $\{1\}\{T\}$               |                              | 0.415 | 0.25  | 0.222  |
| $\{2\}\{T\}$               |                              | 0.415 | 0.25  | 0.222  |
| $\{1\}\{2, T\}$            |                              | 0.17  | 0.04  | 0.041  |
| $\{2\}\{1, T\}$            |                              | 0.17  | 0.04  | 0.041  |
| $\{T\}\{1, 2\}$            |                              | 0.17  | 0.104 | 0.041  |
| $\{1\}$                    |                              | 0.0   | 0.292 | 0.322  |
| $\{2\}$                    |                              | 0.0   | 0.292 | 0.322  |
| $\{T\}$                    |                              | 0.0   | 0.0   | 0.322  |
| $\{1, 2\}\{1, T\}\{2, T\}$ |                              | 0.245 | 0.0   | 0.018  |
| $\{1, 2\}\{1, T\}$         |                              | 0.0   | 0.104 | 0.093  |
| $\{1, 2\}\{2, T\}$         |                              | 0.0   | 0.104 | 0.093  |
| $\{1, T\}\{2, T\}$         |                              | 0.0   | 0.0   | 0.093  |
| $\{1, 2\}$                 |                              | 0.0   | 0.104 | 0.17   |
| $\{1, T\}$                 |                              | 0.0   | 0.0   | 0.17   |
| $\{2, T\}$                 |                              | 0.0   | 0.0   | 0.17   |
| $\{1, 2, T\}$              |                              | 0.0   | 0.0   | 0.245  |

Table S3. The Partial Entropy Decomposition for the XOR, AND, and Maximum Entropy Gates.

**C. Independent Variables.** One unusual property of  $h_{sx}$ , as demonstrated by the logical-XOR results is that independent variables can still share entropy. This is a recognized feature of multiple measures of redundant information/entropy and is generally considered to be an issue to be excised (14) (some have gone so far as the suggest an axiom that such a property must be disallowed from the outset (15)). While we understand that shared entropy for random variables may seem initially counter intuitive, it can be readily understood when considering the problem of inference. Let us return to our two element example (Table 1), and this time specify that  $X_1 \perp X_2$ . We know then that  $\mathcal{I}(X_1; X_2) = 0$  bit, however,  $h_{sx}(\{X_1\}\{X_2\}) \approx 0.415$  bit. Why? The answer is that, while the two variables are independent, in all cases learning either  $X_1 = x_1 \vee X_2 = x_2$  is sufficient to exclude a single possible state: the case where  $X_1 = \neg x_1 \wedge X_2 = \neg x_2$ . If we were to formalize this in terms of a gambling problem, we would find that, despite the independence of both variables, a player is, in fact, more likely to win with a correct guess after learning  $X_1 \vee X_2$ . See Figure S3.

Furthermore, we can see that, while  $h_{sx}$  will be greater than zero for small, maximum entropy systems, as the system gets larger, the redundancy will logarithmically trend towards zero. The proof for binary systems is straightforward. For a discrete, maximum entropy system with  $k$  elements, learning the state of  $X_1 = x_1 \vee \dots \vee X_k = x_k$  will always exclude a single state: the state where  $X_1 \neq x_1 \wedge \dots \wedge X_k \neq x_k$ . This single state  $\mathbf{x}^*$  will have  $\mathcal{P}(\mathbf{x}^*) = 1/k$  (as all states have the same probability by the maximum entropy constraint). The union of all surviving configurations will be  $1 - \mathcal{P}(\mathbf{x}^*)$ . Since  $\lim_{k \rightarrow \infty} 1/k = 0$ , then the

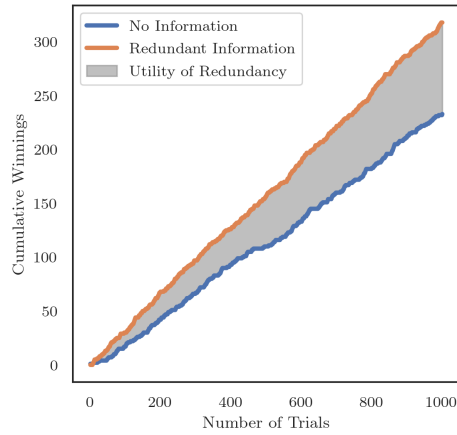

**Fig. S3. Utility of redundant information.** Suppose an agent plays a gambling game, where two independent, binary variables are set at random (so all outcomes  $\mathcal{P}(x_1, x_2) = 1/4$  for all configurations). If the agent guesses the correct configuration of both variables, they win \$1 and if they guess wrong, they win nothing. Clearly, the expected value of each trial is \$0.25 (blue curve). However, if another agent learns that  $X_1 = x_1 \vee X_2 = x_2$ , then they can do better at the game, with an expected value of each trial of \$0.33. The difference between the two cumulative distributions of 1000 trials is the extra value that can be extracted from the redundant information. This shows that, while counter-intuitive, the fact that  $\mathcal{H}_\partial^{12}(\{1\}\{2\}) > 0$  even if  $X_1 \perp X_2$  is interpretable in practical contexts.

161 union probability will  $\rightarrow 1$  and consequently  $h_{sx} \rightarrow 0$  bit. This suggests that, for very large, idealized systems (such as an ideal  
 162 gas), the redundancy *does* go to 0 bit for maximum entropy systems. How other values (such as the redundant and synergistic  
 163 structure) behave remains an area of further study, although we conjecture that, as  $k \rightarrow \infty$ , redundancies and synergies will  
 164 vanish faster than unique terms.

165 **D.  $\mathcal{H}_{sx}$  & Pairwise Dependency Constraints.** The  $h_{sx}$  measure is built on the full joint distribution, rather than the maximum  
 166 entropy distribution that preserves pairwise marginals. While this as a departure from historical approaches to PID, we do not  
 167 consider it necessarily problematic for two reasons:

168 In Bertschinger's original proposal (7, 8) that the redundancy depends solely on pairwise marginals, the focus was on the  
 169 particular case of two inputs  $X_1, X_2$  that were jointly disclosing information about a single target  $Y$ . In this context, the focus  
 170 on pairwise marginals makes sense, as the double synergy term  $\{X_1, X_2\}$  is the only relevant higher-order term. However, as  
 171 the number of elements grows, we feel the focus on pairwise marginals becomes less natural.

172 For instance, consider the atom  $\{1, 2, 3\}\{2, 3, 4\}$ , which appears in the partial entropy lattice for a set of four elements  
 173  $\{X_1, X_2, X_3, X_4\}$ . Since this atom only contains higher-order information in the joint states of three variables, it does not feel  
 174 natural that it must be computed from the marginals  $X_1, X_2$ , etc. At this point on the lattice, it is assumed that the observer  
 175 has access to the joint states of at least three variables:  $(X_1, X_2, X_3)$  and the joint state of  $(X_2, X_3, X_4)$ . Based on Bertschinger  
 176 et al. (7, 8), it could be argued that the atom  $\{1, 2, 3\}\{2, 3, 4\}$  should be calculated with respect to the distribution that  
 177 preserves third-order marginals, however that opens a difficult can of worms: should every atom in the lattice be computed  
 178 with respect to the maximum entropy distribution that preserves the marginals of whatever the lowest-order source in the  
 179 atoms is? While this is an intriguing possibility, attempting to implement this is beyond the existing capabilities of our code  
 180 and the **SxPID** package.

181 There is another angle as well. If we consider the interpretation that  $h_{sx}(x_1, x_2, x_3) = i_{sx}(x_1, x_2, x_3; \mathbf{x})$  where  $\mathbf{x} = \{x_1, x_2, x_3\}$ ,  
 182 it seems as though knowledge of the whole is implicitly built in, even when considering redundant atoms such as  $\{1\}\{2\}\{3\}$ . If  
 183 we follow the logic that redundancy should only depend on the pairwise dependency between each input and the target, since  
 184  $\mathbf{X}$  is the target, the joint state of the whole is already accounted for.

185 Ince's PED approach (1) required computing  $h_{ccs}$  with respect to the maximum entropy distribution that preserves pairwise  
 186 marginals. In this case though, since the distribution of the whole is the target distribution, this approach seems unnatural,  
 187 since involves changing the statistics of the whole: effectively decomposing the entropy of an entirely different system than the  
 188 one under study. Ultimately,  $h_{sx}$  as it is currently formulated, cannot be easily be reconfigured to accommodate the pairwise  
 189 dependency restriction.

## 190 4. Basic Information Theory Review

191 Here we will provide a basic overview of information theory for unfamiliar readers. For a more comprehensive treatment of the  
 192 subject, see the textbooks by Cover & Thomas (10) and/or MacKay (11).

193 The basic object of study in information theory is the *entropy*, which quantifies the total uncertainty that we, as observers,  
 194 have about the state of some variable  $X$ . For the purposes of this paper, we will assume that  $X$  is discrete, with a finite  
 195 number of possible states that can be pulled from the support set  $\mathcal{X}$ . For every particular state  $x \in \mathcal{X}$ , there is an associated  
 196 probability  $\mathcal{P}(x)$ . The entropy of  $X$  is given by:



$$H(X) = - \sum_{x \in \mathcal{X}} \mathcal{P}(x) \log \mathcal{P}(x) \quad [23]$$

For multiple variables, we can define the joint entropy as:

$$H(X_1, X_2) = - \sum_{\substack{x_1 \in \mathcal{X}_1 \\ x_2 \in \mathcal{X}_2}} \mathcal{P}(x_1, x_2) \log \mathcal{P}(x_1, x_2) \quad [24]$$

We can also define the conditional entropy as the uncertainty about  $X_1$  *left over* after accounting for the knowledge that  $X_2 = x_2$ :

$$H(X_1|X_2) = - \sum_{\substack{x_1 \in \mathcal{X}_1 \\ x_2 \in \mathcal{X}_2}} \mathcal{P}(x_1, x_2) \log \mathcal{P}(x_1|x_2) \quad [25]$$

From these basic components, we can define the *mutual information* as the difference between our initial uncertainty about the state of  $X_1$  the the remaining uncertainty about  $X_1$  that is not resolved by learning the state of  $X_2$ :

$$I(X_1; X_2) = H(X_1) - H(X_1|X_2) \quad [26]$$

The mutual information is symmetric in it's arguments:  $I(X_1; X_2) = I(X_2; X_1)$ . If we have multiple  $X$ s disclosing information about a single target  $T$ , the joint mutual information has the same form:

$$I(X_1, X_2; T) = H(T) - H(T|X_1, X_2) \quad [27]$$

The mutual information can also be written in terms of probabilities:

$$I(X_1; X_2) = \sum_{\substack{x_1 \in \mathcal{X}_1 \\ x_2 \in \mathcal{X}_2}} \mathcal{P}(x_1, x_2) \log \frac{\mathcal{P}(x_1|x_2)}{\mathcal{P}(x_1)} \quad [28]$$

**A. Local Information Theory.** Both the entropy and the mutual information can be understood as expected values over some (potentially multivariate) distribution):

$$H(X) = \mathbb{E}[-\log \mathcal{P}(x)] \quad [29]$$

The term  $-\log \mathcal{P}(x)$  is known as the *local entropy* or the *Shannon information content* and it quantifies how surprised we, as observers are to see that  $X = x$ . It is typically denoted as  $h(x)$ .

$$I(X_1; X_2) = \mathbb{E} \left[ \log_2 \frac{\mathcal{P}(x_1|x_2)}{\mathcal{P}(x_1)} \right] \quad [30]$$

The term  $\frac{\mathcal{P}(x_1|x_2)}{\mathcal{P}(x_1)}$  is known as the *local mutual information* and it quantifies the divergence between the prior probability  $X_1 = x_1$  and the posterior probability  $X_1 = x_1$  *after accounting for the fact that*  $X_2 = x_2$ . It is typically denoted as  $i(x_1; x_2)$ . Unlike the expected mutual information, which is strictly non-negative, the local mutual information can be either greater than, or less than, zero. If  $\mathcal{P}(x_1|x_2) < \mathcal{P}(x_1)$ , then  $i(x_1; x_2) > 0$ , and if  $\mathcal{P}(x_1|x_2) > \mathcal{P}(x_1)$ , then  $i(x_1; x_2) < 0$ . In the latter case, we say that  $x_1$  *misinforms* on the state of  $x_2$ .

## 5. Derivations

For didactic purposes, we have included a number of derivations of the relationships between mutual information and partial entropy atoms. The basic logic is reasonably straightforward: any information-theoretic construct that can be written in terms of joint and marginal entropies can be converted into partial entropy atoms by first decomposing each of the constituent entropies, and then summing them together in accordance with the original definition. Importantly, all atoms must be pulled from the lattice describing the structure of the whole system.

**A. Derivation of Eq. 5.** Eq. 5 shows:

$$\mathcal{I}(X_1; X_2) = \mathcal{H}_\partial^{12}(\{1\}\{2\}) - \mathcal{H}_\partial^{12}(\{1, 2\})$$

This can be derived from:

$$\mathcal{I}(X_1; X_2) = \mathcal{H}(X_1) + \mathcal{H}(X_2) - \mathcal{H}(X_1, X_2)$$

From Eqs. 2, 3 and 4 we have:

$$\begin{aligned}
\mathcal{H}(X_1; X_2) &= \mathcal{H}_\partial^{12}(\{1\}\{2\}) + \mathcal{H}_\partial^{12}(\{1\}) \\
&\quad + \mathcal{H}_\partial^{12}(\{2\}) + \mathcal{H}_\partial^{12}(\{1, 2\}) \\
\mathcal{H}(X_1) &= \mathcal{H}_\partial^{12}(\{1\}\{2\}) + \mathcal{H}_\partial^{12}(\{1\}) \\
\mathcal{H}(X_2) &= \mathcal{H}_\partial^{12}(\{1\}\{2\}) + \mathcal{H}_\partial^{12}(\{2\})
\end{aligned}$$

233 Basic substitution shows that:

$$\begin{aligned}
\mathcal{I}(X_1; X_2) &= \mathcal{H}_\partial^{12}(\{1\}\{2\}) + \mathcal{H}_\partial^{12}(\{1\}) + \mathcal{H}_\partial^{12}(\{1\}\{2\}) + \mathcal{H}_\partial^{12}(\{2\}) \\
&\quad - \mathcal{H}_\partial^{12}(\{1\}\{2\}) - \mathcal{H}_\partial^{12}(\{1\}) - \mathcal{H}_\partial^{12}(\{2\}) - \mathcal{H}_\partial^{12}(\{1, 2\})
\end{aligned}$$

234 Simplifying returns Eq. 5.

235 **B. Derivation of Eq. 6.** Eq. 16 shows that in a triad  $X_1, X_2, X_3$ , the bivariate mutual information decomposes as:

$$\begin{aligned}
\mathcal{I}(X_1; X_2) &= \mathcal{H}_\partial^{123}(\{1\}\{2\}\{3\}) + \mathcal{H}_\partial^{123}(\{1\}\{2\}) \\
&\quad - \mathcal{H}_\partial^{123}(\{3\}\{1, 2\}) - \mathcal{H}_\partial^{123}(\{1, 2\}\{1, 3\}\{2, 3\}) \\
&\quad - \mathcal{H}_\partial^{123}(\{1, 2\}\{1, 3\}) - \mathcal{H}_\partial^{123}(\{1, 2\}\{2, 3\}) \\
&\quad - \mathcal{H}_\partial^{123}(\{1, 2\})
\end{aligned}$$

236 The logic is essentially the same as was given above, however, atoms are drawn from the three element lattice:

$$\begin{aligned}
\mathcal{H}(X_1) &= \mathcal{H}_\partial^{123}(\{1\}\{2\}\{3\}) + \mathcal{H}_\partial^{123}(\{1\}\{2\}) + \mathcal{H}_\partial^{123}(\{1\}\{3\}) \\
&\quad + \mathcal{H}_\partial^{123}(\{1\}\{2, 3\}) + \mathcal{H}_\partial^{123}(\{1\}) \\
\mathcal{H}(X_2) &= \mathcal{H}_\partial^{123}(\{1\}\{2\}\{3\}) + \mathcal{H}_\partial^{123}(\{1\}\{2\}) + \mathcal{H}_\partial^{123}(\{2\}\{3\}) \\
&\quad + \mathcal{H}_\partial^{123}(\{2\}\{1, 3\}) + \mathcal{H}_\partial^{123}(\{2\}) \\
\mathcal{H}(X_1, X_2) &= \mathcal{H}_\partial^{123}(\{1\}\{2\}\{3\}) + \mathcal{H}_\partial^{123}(\{1\}\{2\}) + \mathcal{H}_\partial^{123}(\{1\}\{3\}) + \mathcal{H}_\partial^{123}(\{2\}\{3\}) \\
&\quad + \mathcal{H}_\partial^{123}(\{1\}\{2, 3\}) + \mathcal{H}_\partial^{123}(\{2\}\{1, 3\}) + \mathcal{H}_\partial^{123}(\{3\}\{1, 2\}) \\
&\quad + \mathcal{H}_\partial^{123}(\{1\}) + \mathcal{H}_\partial^{123}(\{2\}) + \mathcal{H}_\partial^{123}(\{1, 2\}\{1, 3\}\{2, 3\}) \\
&\quad + \mathcal{H}_\partial^{123}(\{1, 2\}\{1, 3\}) + \mathcal{H}_\partial^{123}(\{1, 2\}\{2, 3\}) \\
&\quad + \mathcal{H}_\partial^{123}(\{1, 2\})
\end{aligned}$$

237 Once again, substitution and simplification shows:

$$\begin{aligned}
\mathcal{I}(X_1; X_2) &= \mathcal{H}_\partial^{123}(\{1\}\{2\}\{3\}) + \mathcal{H}_\partial^{123}(\{1\}\{2\}) \\
&\quad - \mathcal{H}_\partial^{123}(\{3\}\{1, 2\}) - \mathcal{H}_\partial^{123}(\{1, 2\}\{1, 3\}\{2, 3\}) \\
&\quad - \mathcal{H}_\partial^{123}(\{1, 2\}\{1, 3\}) - \mathcal{H}_\partial^{123}(\{1, 2\}\{2, 3\}) \\
&\quad - \mathcal{H}_\partial^{123}(\{1, 2\})
\end{aligned}$$

238 Similar logic underlies the derivation of Eq. 7, using the identity that  $\mathcal{I}(X_1; X_2|X_3) = \mathcal{H}(X_1; X_3) + \mathcal{H}(X_2; X_3) -$   
239  $\mathcal{H}(X_1, X_2, X_3) - \mathcal{H}(X_3)$ .

240 **C. Derivation of Eq. 10.** Equation 10 describes how the total correlation can be decomposed into partial entropy atoms:

$$\begin{aligned}
\mathcal{T}(X_1, X_2, X_3) &= (2 \times \mathcal{H}_\partial^{123}(\{1\}\{2\}\{3\})) \\
&\quad + \mathcal{H}_\partial^{123}(\{1\}\{2\}) + \mathcal{H}_\partial^{123}(\{1\}\{3\} + \{2\}\{3\}) \\
&\quad - \mathcal{H}_\partial^{123}(\{1, 2\}\{1, 3\}\{2, 3\}) \\
&\quad - \mathcal{H}_\partial^{123}(\{1, 2\}\{1, 3\}) - \mathcal{H}_\partial^{123}(\{1, 2\}\{2, 3\}) - \mathcal{H}_\partial^{123}(\{1, 3\}\{2, 3\}) \\
&\quad - \mathcal{H}_\partial^{123}(\{1, 2\}) - \mathcal{H}_\partial^{123}(\{1, 3\}) - \mathcal{H}_\partial^{123}(\{2, 3\}) \\
&\quad - \mathcal{H}_\partial^{123}(\{1, 2, 3\})
\end{aligned}$$

241 The logic of the decomposition is the same as above: we begin by writing the total correlation out in terms of joint and  
 242 marginal entropies:

$$243 \quad \mathcal{T}(X_1, X_2, X_3) := \sum_{i=1}^3 \mathcal{H}(X_i) - \mathcal{H}(X_1, X_2, X_3)$$

244 which can be decomposed:

$$\begin{aligned} \mathcal{H}(X_1) &= \mathcal{H}_\theta^{123}(\{1\}\{2\}\{3\}) + \mathcal{H}_\theta^{123}(\{1\}\{2\}) + \mathcal{H}_\theta^{123}(\{1\}\{3\}) \\ &\quad + \mathcal{H}_\theta^{123}(\{1\}\{2, 3\}) + \mathcal{H}_\theta^{123}(\{1\}) \\ \mathcal{H}(X_2) &= \mathcal{H}_\theta^{123}(\{1\}\{2\}\{3\}) + \mathcal{H}_\theta^{123}(\{1\}\{2\}) + \mathcal{H}_\theta^{123}(\{2\}\{3\}) \\ &\quad + \mathcal{H}_\theta^{123}(\{2\}\{1, 3\}) + \mathcal{H}_\theta^{123}(\{2\}) \\ \mathcal{H}(X_3) &= \mathcal{H}_\theta^{123}(\{1\}\{2\}\{3\}) + \mathcal{H}_\theta^{123}(\{1\}\{3\}) + \mathcal{H}_\theta^{123}(\{2\}\{3\}) \\ &\quad + \mathcal{H}_\theta^{123}(\{3\}\{1, 2\}) + \mathcal{H}_\theta^{123}(\{3\}) \\ \mathcal{H}(X_1, X_2) &= \mathcal{H}_\theta^{123}(\{1\}\{2\}\{3\}) + \mathcal{H}_\theta^{123}(\{1\}\{2\}) + \mathcal{H}_\theta^{123}(\{1\}\{3\}) + \mathcal{H}_\theta^{123}(\{2\}\{3\}) \\ &\quad + \mathcal{H}_\theta^{123}(\{1\}\{2, 3\}) + \mathcal{H}_\theta^{123}(\{2\}\{1, 3\}) + \mathcal{H}_\theta^{123}(\{3\}\{1, 2\}) \\ &\quad + \mathcal{H}_\theta^{123}(\{1\}) + \mathcal{H}_\theta^{123}(\{2\}) + \mathcal{H}_\theta^{123}(\{3\}) + \mathcal{H}_\theta^{123}(\{1, 2\}\{1, 3\}\{2, 3\}) \\ &\quad + \mathcal{H}_\theta^{123}(\{1, 2\}\{1, 3\}) + \mathcal{H}_\theta^{123}(\{1, 2\}\{2, 3\}) + \mathcal{H}_\theta^{123}(\{1, 2\}\{2, 3\}) \\ &\quad + \mathcal{H}_\theta^{123}(\{1, 2\}) + \mathcal{H}_\theta^{123}(\{1, 3\}) + \mathcal{H}_\theta^{123}(\{2, 3\}) \\ &\quad + \mathcal{H}_\theta^{123}(\{1, 2, 3\}) \end{aligned}$$

245 The same logic can be applied to Eq. 12 to decompose the dual total correlation (with the insight that  $\mathcal{H}(X_1|X_2, X_3) =$   
 246  $\mathcal{H}(X_1, X_2, X_3) - \mathcal{H}(X_2, X_3)$ ), and from there, the O-information can be computed via subtraction of the sets of atoms.

## 247 6. Materials & Methods

248 **A. Human Connectome Project fMRI Data.** The data used in this study was taken from a set of 100 unrelated subjects included  
 249 in the Human Connectome Project (HCP) (17). Refs (17, 18) provide a detailed description of the acquisition and preprocessing  
 250 of this data, which have been used in many previous studies (19, 20). Briefly, all subjects gave informed consent to protocols  
 251 approved by the Washington University Institutional Review Board. Data was collected with a Siemens 3T Connectom Skyra  
 252 using a head coil with 32 channels. Functional data analysed here was acquired during resting state with a gradient-echo  
 253 echo-planar imaging (EPI) sequence. Collection occurred over four scans on two separate days (scan duration: 14:33 min;  
 254 eyes open). The main acquisition parameters included TR = 720 ms, TE = 33.1 ms, flip angle of 52°, 2 mm isotropic voxel  
 255 resolution, and a multiband factor of 8. Resting state data was mapped to a 200-node parcellation scheme (21) covering the  
 256 entire cerebral cortex.

257 Considerations for subject inclusion were established before the study and are as follows. The mean and mean absolute  
 258 deviation of the relative root mean square (RMS) motion throughout any of the four resting scans were calculated. Subjects  
 259 that exceeded 1.5 times the interquartile range in the adverse direction for two or more measures they were excluded. This  
 260 resulted in the exclusion of four subjects, and an additional subject due to a software error during diffusion MRI processing.  
 261 The included subjects had demographic characteristics of: 56% female, mean age = 29.29 ± 3.66, age range = 22-36 years.

262 **A.1. Preprocessing.** The minimal preprocessing of HCP rs-fMRI data can be found described in detail in Ref. (18). Five main  
 263 steps were followed: 1) susceptibility, distortion, and motion correction; 2) registration to subject-specific T1-weighted data;  
 264 3) bias and intensity normalization; 4) projection onto the 32k\_fs\_LR mesh; and 5) alignment to common space with a  
 265 multimodal surface registration (81). This pipeline produced an ICA+FIX time series in the CIFTI grayordinate coordinate  
 266 system. We included two additional preprocessing steps: 6) global signal regression and 7) detrending and band pass filtering  
 267 (0.008 to 0.08 Hz) (22). We discarded the first and last 50 frames of each time series after confound regression and filtering to  
 268 produce final scans with length 13.2 min (1,100 frames). All four scans from 95 subjects were then z-scored and concatenated  
 269 to give a final time-series of 200 brain regions and 418,000 time points.

270 **A.2. Discretizing BOLD Signals.** Unfortunately, the  $\mathcal{H}_{sx}$  measure is only well-defined for discrete random variables. Consequently,  
 271 we discretized our data by binarizing the z-scored time series: setting any value greater than zero to one and any value less than  
 272 zero to zero. Prior work has established that transforming BOLD signals into binary point processes preserves the majority of  
 273 the total correlation structure (19, 23), so we are confident that our analysis is robust, especially considering the large number  
 274 of samples.

275 We chose to binarize around the z-score (as opposed to alternative point-processing techniques such as local maxima), as  
 276 the z-score ensures that each individual channel is generally maximally entropic (i.e.  $\mathcal{P}(X_i = 1) \approx \mathcal{P}(X_i = 0) \approx 1/2$ ). This  
 277 ensures that every individual channel has approximately the same entropy, and so deviations from maximum entropy at the

278 level of the entire triad or tetrad can *only* emerge from correlations between two or more channels, rather than being influenced  
 279 by biases at the channel-level. The choice to binarize about the mean also links this work to previous work on decomposing  
 280 functional connectivity into discrete partitions (19).

## 281 B. Statistical Analyses.

282 **B.1. Triads & tetrads.** In standard FC analysis, it is typical to compute the pairwise correlation between all pairs of brain regions,  
 283 resulting  $\binom{N}{2}$  unique pairs. For this analysis, we computed all triads of brain regions, resulting in  $\binom{200}{3} = 1,313,400$  unique  
 284 triples. For each triad, we computed the joint entropy, and performed the full partial entropy decomposition to compute each  
 285 of the eighteen partial entropy atoms. Finally, each of the atoms was normalized by the total joint entropy, to give a measure  
 286 of how much each atom contributes to the whole entropy. This allows us to directly compare triads that have different joint  
 287 entropies.

288 It was not feasible to brute-force all possible tetrads, which is a set of approximately sixty-four million. Instead, we randomly  
 289 sub-sampled sets of four randomly, collecting 1954000 tetrads ( $\approx 3\%$  of the total space) and analyzing them.

290 **B.2. Bivariate functional connectivity networks.** To directly compare the PED framework to the standard, correlation-based FC  
 291 network framework, we constructed single, representative FC network by computing the pairwise mutual information between  
 292 every pair of regions in the fMRI scan (as was done in (20)).

$$293 \mathcal{I}(X; Y) = \mathcal{H}(X) + \mathcal{H}(Y) - \mathcal{H}(X, Y) \quad [31]$$

294 **B.3. Subgraph Analysis.** Since we are interested in how the bivariate FC framework reflects (or fails to reflect) higher-order  
 295 redundancies and synergies, we also compute a battery of structure metrics on matching subgraphs taken from the FC network.  
 296 Formally presented by Onnela et al., (13), we consider arithmetic mean of the subgraph connectivity:

$$297 \mathcal{G}_{\text{st}}(\mathbf{X}) = \frac{\sum_{i \neq j} \mathcal{I}(X_i; X_j)}{|\mathbf{X}|^2 - |\mathbf{X}|} \quad [32]$$

298 For a given triad of tetrad  $\mathbf{X}$ , we compared the mean FC density to the various redundant and synergistic information-sharing  
 299 structures of  $\mathbf{X}$ .

300 **B.4. Community Detection on Bivariate Matrices.** Multi-resolution consensus clustering (26) was used to detect network communities  
 301 in the functional connectivity matrix across multiple scales. The algorithm proceeds in three main stages. In the first stage,  
 302 modularity maximization using the Louvain method is performed for 1,000 different values of the resolution parameter,  $\gamma$ . This  
 303 produced a range of  $\gamma$  values that resulted with partitions having between 2 and  $N$  communities. The second stage consisted of  
 304 a more fine-grained sweep (10,000 steps) over the  $\gamma$  values defined in the first stage of the process. We aggregate the partitions  
 305 produced by this sweep into a node-by-node co-classification matrix storing how frequently nodes are partitioned into the same  
 306 community. A null model with expected values of co-classification based on the size and number of communities was subtracted  
 307 from the co-classification matrix (26). Finally, in the third stage, the null-adjusted co-classification matrix was clustered again  
 308 using consensus clustering with 100 repetitions and a consensus threshold  $\tau$  of 0 (24). The resulting partition was used for  
 309 analyses.

310 We assessed the similarity between single-subject partitions and consensus partitions using Normalized Mutual Information  
 311 (NMI). Each partition can be formalized as a vector of integers of dimension  $N$  whose entries denote the nodes' allegiance to  
 312 communities. NMI estimates the similarity between two partitions by counting co-occurrences in the two vectors.

313 We computed NMI between each one of the 95 single-subject partitions and the consensus partition, in both cases of  
 314 redundancy and synergy hypergraphs. We assessed the significance of NMI values by comparing them with a null case obtained  
 315 by randomly shuffling 1000 times communities labels in the single-subject partitions. The  $p$ -values of the statistical test,  
 316 calculated as the fraction of null-case NMI greater than the actual NMI, have been corrected with a Benjamini-Hochberg test.

317 **B.5. Null Model.** To ensure that the statistical dependencies we were observing reflect non-trivial interactions, we significance-  
 318 tested triads and tetrads against a null distribution composed of one million, maximum entropy null models. We constructed  
 319 sets of totally independent, maximum entropy binary time series and computed the PED on each set of three or four null  
 320 channels. From this, we can construct distributions of the expected null structure and expected synergistic structure against  
 321 which to compare triads and tetrads.

322 **B.6. Hypergraph Community Detection.** Each of the triads can be thought of as a hyper-edge on a 3-uniform hypergraph of 200  
 323 nodes. For the synergistic structure, we selected only those hyperedges who had a *greater* synergistic structure than any of the  
 324 one million maximum-entropy nulls that formed our null distribution. This resulted in a hypergraph with 200 hundred nodes  
 325 and 3,746 regular hyper-edges. We used the same criteria to build a redundant structure hypergraph using the top 3,746 most  
 326 redundant hyperedges.

327 Both hypergraphs were clustered using the **HyperNetX** package (available on Github: <https://github.com/pnnl/HyperNetX>)  
 328 implementation of the hyper-modularity optimization by Kumar and Vaidyanathan et al., (27).

329 Briefly, the algorithm by Kumar and Vaidyanathan et al., takes a modularity maximization approach to partitioning  
 330 the vertices of a hypergraph into non-overlapping communities. In dyadic networks, the modularity function compares the

331 distribution of within- and between-community edges to the expected distribution based on a degree-preserving, configuration  
332 null model (25). In the case of hypergraphs, a hyper-configuration model can be used instead. A generalized modularity metric  
333 can then be used as an objective function in a Louvain-based, modularity maximization search.

334 **B.7. Temporal Structure.** To explore the temporal structure of the state-transition series, we used the active information storage  
335 (28, 29) (a measure of how predictable is the future given the past) and the determinism (30, 31), (a measure of how constrained  
336 the future is given the past). For a one dimensional, discrete random variable  $X$  that evolves through time, we can compute  
337 the information that the past  $X_{t-1}$  discloses about the future  $X_t$  with the mutual information:

$$338 \quad \mathcal{AIS}(X) = \mathcal{I}(X_{t-1}; X_t) \quad [33]$$

339 This measure quantifies the degree to which knowing the past reduces our uncertainty about the future. This term can be  
340 further decomposed into two components: the determinism and the degeneracy (30):

$$341 \quad \mathcal{I}(X_{t-1}; X_t) = \text{Det}(X) - \text{Deg}(X) \quad [34]$$

342 Where determinism is:

$$343 \quad \text{Det}(X) = \log_2(N) - \mathcal{H}(X_t|X_{t-1}) \quad [35]$$

344 And degeneracy is:

$$345 \quad \text{Deg}(X) = \log_2(N) - \mathcal{H}(X_t) \quad [36]$$

346 The determinism quantifies how reliably a given past state  $x_{t-1}$  leads to a single future state  $x_t$ . If  $\mathcal{P}(x_t|x_{t-1}) \approx 1$ , then we  
347 say that  $x_{t-1}$  *deterministically* leads to  $x_t$ .

348 We significance tested both the active information storage and the determinism by comparing the empirical values to an  
349 ensemble of ten thousand randomly permuted nulls generated by shuffling the time series. Since the degeneracy is unchanged  
350 by permutation of the temporal structure (since the marginal entropy  $\mathcal{H}(X_t)$  is the same), any changes in active information  
351 storage produced by shuffling must be driven by changes in the determinism.

352 **C. Software.** All partial information/entropy decompositions were done using the **SxPID** package released with (3) and can be  
353 accessed on Github: <https://github.com/Abzinger/SxPID>.

354 **D. Data & Software Sharing.** Data and software are provided as supplementary material. Supplementary software includes:

- 355 • **Code S1:** Cython script for computing PEDs for triads and tetrads. Change the .txt extension to .pyx.
- 356 • **Code S2:** Python code for analysing the rank-differences between triads, the framewise similarities, and the active  
357 information storage analysis. Change the .txt extension to .py.
- 358 • **Code S3:** Python code for analysing the relationship between PEDs and bivariate correlations. Constructs Figure 1.  
359 Change the .txt extension to .py.
- 360 • **Code S4:** Python code for constructing Figure 2 and 3. Change the .txt extension to .py.

361 Supplementary datasets include:

- 362 • **Datasets S1-10:** 10 .csv files containing results for the triads.
- 363 • **Dataset S11-20:** 10 .csv files containing results for the tetrads.
- 364 • **Dataset S21-30:** 10 .csv files containing the null triad analyses.

## 365 References

- 366 1. Robin A. A. Ince. The Partial Entropy Decomposition: Decomposing multivariate entropy and mutual information via  
367 pointwise common surprisal. *arXiv:1702.01591 [cs, math, q-bio, stat]*, February 2017. arXiv: 1702.01591.
- 368 2. Conor Finn and Joseph T. Lizier. Pointwise Partial Information Decomposition Using the Specificity and Ambiguity  
369 Lattices. *Entropy*, 20(4):297, April 2018. Number: 4
- 370 3. Abdullah Makkeh, Aaron J. Gutknecht, and Michael Wibral. Introducing a differentiable measure of pointwise shared  
371 information. *Physical Review E*, 103(3):032149, March 2021.
- 372 4. Paul L. Williams and Randall D. Beer. Nonnegative Decomposition of Multivariate Information. *arXiv:1004.2515 [math-ph,*  
373 *physics:physics, q-bio]*, April 2010. arXiv: 1004.2515.
- 374 5. Conor Finn and Joseph T. Lizier. Probability Mass Exclusions and the Directed Components of Mutual Information.  
375 *Entropy*, 20(11):826, November 2018. Number: 11
- 376 6. Conor Finn and Joseph T. Lizier. Generalised Measures of Multivariate Information Content. *Entropy*, 22(2):216, February  
377 2020. Number: 2

- 378 7. Nils Bertschinger, Johannes Rauh, Eckehard Olbrich, Jürgen Jost, and Nihat Ay. Quantifying Unique Information. *Entropy*,  
379 16(4):2161–2183, April 2014. Number: 4
- 380 8. Nils Bertschinger, Johannes Rauh, Eckehard Olbrich, and Jürgen Jost. Shared Information – New Insights and Problems  
381 in Decomposing Information in Complex Systems arXiv:1210.5902 [cs, math].
- 382 9. Adam B. Barrett. Exploration of synergistic and redundant information sharing in static and dynamical Gaussian systems.  
383 *Physical Review E*, 91(5):052802, May 2015.
- 384 10. Thomas M. Cover and Joy A. Thomas. *Elements of Information Theory*. John Wiley & Sons, November 2012.
- 385 11. David J. C. MacKay. *Information Theory, Inference and Learning Algorithms*. Cambridge University Press, September  
386 2003.
- 387 12. A. J. Gutknecht, M. Wibral, and A. Makkeh. Bits and pieces: understanding information decomposition from part-whole  
388 relationships and formal logic. *Proceedings of the Royal Society A: Mathematical, Physical and Engineering Sciences*,  
389 477(2251):20210110, July 2021.
- 390 13. Jukka-Pekka Onnela, Jari Saramäki, János Kertész, and Kimmo Kaski. Intensity and coherence of motifs in weighted  
391 complex networks. *Physical Review E*, 71(6):065103, June 2005.
- 392 14. Artemy Kolchinsky. A Novel Approach to the Partial Information Decomposition. *Entropy*, 24(3):403, March 2022.  
393 Number: 3
- 394 15. Robin A. A. Ince. Measuring Multivariate Redundant Information with Pointwise Common Change in Surprisal. *Entropy*,  
395 19(7):318, July 2017. Number: 7
- 396 16. David A. Ehrlich, Andreas C. Schneider, Michael Wibral, Viola Priesemann, and Abdullah Makkeh. Partial Information  
397 Decomposition Reveals the Structure of Neural Representations, September 2022. arXiv:2209.10438 [cs, math, stat].
- 398 17. David C. Van Essen, Stephen M. Smith, Deanna M. Barch, Timothy E. J. Behrens, Essa Yacoub, and Kamil Ugurbil. The  
399 WU-Minn Human Connectome Project: An overview. *NeuroImage*, 80:62–79, October 2013.
- 400 18. Matthew F. Glasser, Stamatiou N. Sotiropoulos, J. Anthony Wilson, Timothy S. Coalson, Bruce Fischl, Jesper L. Andersson,  
401 Junqian Xu, Saad Jbabdi, Matthew Webster, Jonathan R. Polimeni, David C. Van Essen, Mark Jenkinson, and WU-Minn  
402 HCP Consortium. The minimal preprocessing pipelines for the Human Connectome Project. *NeuroImage*, 80:105–124,  
403 October 2013.
- 404 19. Olaf Sporns, Joshua Faskowitz, Andreia Sofia Teixeira, Sarah A. Cutts, and Richard F. Betzel. Dynamic expression of  
405 brain functional systems disclosed by fine-scale analysis of edge time series. *Network Neuroscience*, 5(2):405–433, May  
406 2021.
- 407 20. Maria Pope, Makoto Fukushima, Richard F. Betzel, and Olaf Sporns. Modular origins of high-amplitude co-fluctuations in  
408 fine-scale functional connectivity dynamics. *Proceedings of the National Academy of Sciences*, 118(46), November 2021.
- 409 21. Alexander Schaefer, Ru Kong, Evan M. Gordon, Timothy O. Laumann, Xi-Nian Zuo, Avram J. Holmes, Simon B. Eickhoff,  
410 and B. T. Thomas Yeo. Local-Global Parcellation of the Human Cerebral Cortex from Intrinsic Functional Connectivity  
411 MRI. *Cerebral Cortex (New York, N.Y.: 1991)*, 28(9):3095–3114, September 2018.
- 412 22. Linden Parkes, Ben Fulcher, Murat Yücel, and Alex Fornito. An evaluation of the efficacy, reliability, and sensitivity of  
413 motion correction strategies for resting-state functional MRI. *NeuroImage*, 171:415–436, May 2018.
- 414 23. Enzo Tagliazucchi, Pablo Balenzuela, Daniel Fraiman, and Dante R. Chialvo. Criticality in Large-Scale Brain fMRI  
415 Dynamics Unveiled by a Novel Point Process Analysis. *Frontiers in Physiology*, 3, 2012.
- 416 24. Andrea Lancichinetti and Santo Fortunato. Consensus clustering in complex networks. *Scientific Reports*, 2(1):336, March  
417 2012. Number: 1
- 418 25. M. E. J. Newman. Modularity and community structure in networks. *Proceedings of the National Academy of Sciences of  
419 the United States of America*, 103(23):8577–8582, June 2006. Number: 23.
- 420 26. Lucas G. S. Jeub, Olaf Sporns, and Santo Fortunato. Multiresolution Consensus Clustering in Networks. *Scientific Reports*,  
421 8(1):3259, February 2018.
- 422 27. Tarun Kumar, Sankaran Vaidyanathan, Harini Ananthapadmanabhan, Srinivasan Parthasarathy, and Balaraman Ravin-  
423 dran. A New Measure of Modularity in Hypergraphs: Theoretical Insights and Implications for Effective Clustering. In  
424 Hocine Cherifi, Sabrina Gaito, José Fernando Mendes, Esteban Moro, and Luis Mateus Rocha, editors, *Complex Networks  
425 and Their Applications VIII*, Studies in Computational Intelligence, pages 286–297, Cham, 2020. Springer International  
426 Publishing.
- 427 28. Joseph T. Lizier. Measuring the Dynamics of Information Processing on a Local Scale in Time and Space. In Michael  
428 Wibral, Raul Vicente, and Joseph T. Lizier, editors, *Directed Information Measures in Neuroscience*, pages 161–193.  
429 Springer Berlin Heidelberg, Berlin, Heidelberg, 2014. Series Title: Understanding Complex Systems.
- 430 29. Joseph T. Lizier, Mikhail Prokopenko, and Albert Y. Zomaya. A Framework for the Local Information Dynamics of  
431 Distributed Computation in Complex Systems. In Mikhail Prokopenko, editor, *Guided Self-Organization: Inception,  
432 Emergence, Complexity and Computation*, pages 115–158. Springer, Berlin, Heidelberg, 2014.
- 433 30. Erik P. Hoel, Larissa Albantakis, and Giulio Tononi. Quantifying causal emergence shows that macro can beat micro.  
434 *Proceedings of the National Academy of Sciences*, 110(49):19790–19795, December 2013. Number: 49.
- 435 31. Thomas F. Varley, Vanessa Denny, Olaf Sporns, and Alice Patania. Topological analysis of differential effects of ketamine  
436 and propofol anaesthesia on brain dynamics. *Royal Society Open Science*, 8(6):201971, June 2021.
